# Supplementary material for: A specific gene expression signature for visceral organ metastasis in breast cancer
Source: BMC Cancer. 2019 Apr 8;19:333. doi: 10.1186/s12885-019-5554-z (PMC6454625; doi:10.1186/s12885-019-5554-z)
Supplement: Supplementary file 1 — Illumina microarray data generated in this study. (XLSX 41 kb) [file 12885_2019_5554_MOESM1_ESM.xlsx]

## Sheet: Metadata Template
# Use this template for Illumina submissions if you used an array already represented in GEO (for example, a commercial array).
# An accompanying matrix table example is included in the second worksheet. Click on the Matrix tab below.
# Most fields in this template must be completed. Incomplete submissions will be returned.
# Field names (in blue on this page) should not be edited. Hover over cells containing field names to view field content guidelines or,
# CLICK HERE for Field Content Guidelines Web page.
SERIES
# This section describes the overall experiment.
title	A novel gene expression signature for bone metastasis in breast tumours. Gene expression data analyses.
summary
summary
overall design
contributor	C. Dilara Savci-Heijink
contributor	Hans Halfwerk
contributor	Jan Koster
contributor	Marc J. van de Vijver
SAMPLES
# The Sample names in the first column are arbitrary but they must match the column headers of the Matrix table (see next worksheet).
# CLICK HERE to find the platform accession number (GPLxxxx).
Sample name	title	source name	organism	characteristics: ER	characteristics: PR	characteristics: Her2	characteristics: Molecular Subtype	characteristics: Bone Metastasis	characteristics: Bone First	characteristics: Bone Only	molecule	description	platform
BC10	Fresh frozen tissue	breast carcinoma	Human	1	1	0	1	1	1	0	mRNA	replicate 1	HT-12 v4
BC100	Fresh frozen tissue	breast carcinoma	Human	1	1	0	2	1	1	0	mRNA	replicate 1	HT-12 v4
BC101	Fresh frozen tissue	breast carcinoma	Human	1	0	0	2	1	1	0	mRNA	replicate 1	HT-12 v4
BC102	Fresh frozen tissue	breast carcinoma	Human	1	1	0	2	1	1	1	mRNA	replicate 1	HT-12 v4
BC103	Fresh frozen tissue	breast carcinoma	Human	0	0	0	0	1	0	0	mRNA	replicate 1	HT-12 v4
BC106	Fresh frozen tissue	breast carcinoma	Human	1	1	0	2	0	0	0	mRNA	replicate 1	HT-12 v4
BC107	Fresh frozen tissue	breast carcinoma	Human	1	1	0	1	1	1	0	mRNA	replicate 1	HT-12 v4
BC108	Fresh frozen tissue	breast carcinoma	Human	1	1	0	2	1	1	0	mRNA	replicate 1	HT-12 v4
BC109	Fresh frozen tissue	breast carcinoma	Human	0	0	1	3	1	1	0	mRNA	replicate 1	HT-12 v4
BC11	Fresh frozen tissue	breast carcinoma	Human	1	1	0	2	0	0	0	mRNA	replicate 1	HT-12 v4
BC110	Fresh frozen tissue	breast carcinoma	Human	1	1	0	2	1	1	0	mRNA	replicate 1	HT-12 v4
BC111	Fresh frozen tissue	breast carcinoma	Human	1	1	0	1	1	1	1	mRNA	replicate 1	HT-12 v4
BC112	Fresh frozen tissue	breast carcinoma	Human	1	1	1	2	1	0	0	mRNA	replicate 1	HT-12 v4
BC113	Fresh frozen tissue	breast carcinoma	Human	0	0	0	0	1	0	0	mRNA	replicate 1	HT-12 v4
BC114	Fresh frozen tissue	breast carcinoma	Human	0	0	0	0	1	1	0	mRNA	replicate 1	HT-12 v4
BC115	Fresh frozen tissue	breast carcinoma	Human	1	0	0	1	1	1	0	mRNA	replicate 1	HT-12 v4
BC116	Fresh frozen tissue	breast carcinoma	Human	0	0	0	0	1	0	0	mRNA	replicate 1	HT-12 v4
BC117	Fresh frozen tissue	breast carcinoma	Human	0	0	0	4	1	1	0	mRNA	replicate 1	HT-12 v4
BC119	Fresh frozen tissue	breast carcinoma	Human	1	1	0	1	1	1	0	mRNA	replicate 1	HT-12 v4
BC12	Fresh frozen tissue	breast carcinoma	Human	1	0	0	2	1	1	0	mRNA	replicate 1	HT-12 v4
BC121	Fresh frozen tissue	breast carcinoma	Human	1	0	1	1	0	0	0	mRNA	replicate 1	HT-12 v4
BC125	Fresh frozen tissue	breast carcinoma	Human	0	0	0	0	1	1	0	mRNA	replicate 1	HT-12 v4
BC127	Fresh frozen tissue	breast carcinoma	Human	0	0	0	0	1	1	0	mRNA	replicate 1	HT-12 v4
BC128	Fresh frozen tissue	breast carcinoma	Human	1	0	0	1	1	1	1	mRNA	replicate 1	HT-12 v4
BC13	Fresh frozen tissue	breast carcinoma	Human	1	0	0	1	0	0	0	mRNA	replicate 1	HT-12 v4
BC132	Fresh frozen tissue	breast carcinoma	Human	1	0	0	1	0	0	0	mRNA	replicate 1	HT-12 v4
BC133	Fresh frozen tissue	breast carcinoma	Human	1	1	1	2	1	1	0	mRNA	replicate 1	HT-12 v4
BC134	Fresh frozen tissue	breast carcinoma	Human	1	1	0	1	1	1	0	mRNA	replicate 1	HT-12 v4
BC135	Fresh frozen tissue	breast carcinoma	Human	1	1	0	1	1	1	0	mRNA	replicate 1	HT-12 v4
BC136	Fresh frozen tissue	breast carcinoma	Human	1	1	0	1	1	1	0	mRNA	replicate 1	HT-12 v4
BC137	Fresh frozen tissue	breast carcinoma	Human	1	1	1	1	1	1	0	mRNA	replicate 1	HT-12 v4
BC138	Fresh frozen tissue	breast carcinoma	Human	1	0	1	1	1	0	0	mRNA	replicate 1	HT-12 v4
BC139	Fresh frozen tissue	breast carcinoma	Human	1	1	0	1	1	1	0	mRNA	replicate 1	HT-12 v4
BC14	Fresh frozen tissue	breast carcinoma	Human	1	1	1	1	1	0	0	mRNA	replicate 1	HT-12 v4
BC140	Fresh frozen tissue	breast carcinoma	Human	0	0	1	3	0	0	0	mRNA	replicate 1	HT-12 v4
BC141	Fresh frozen tissue	breast carcinoma	Human	1	1	1	2	0	0	0	mRNA	replicate 1	HT-12 v4
BC142	Fresh frozen tissue	breast carcinoma	Human	1	1	0	1	1	1	0	mRNA	replicate 1	HT-12 v4
BC143	Fresh frozen tissue	breast carcinoma	Human	1	1	0	1	1	1	0	mRNA	replicate 1	HT-12 v4
BC144	Fresh frozen tissue	breast carcinoma	Human	1	1	1	1	1	0	0	mRNA	replicate 1	HT-12 v4
BC145	Fresh frozen tissue	breast carcinoma	Human	1	1	0	1	1	1	1	mRNA	replicate 1	HT-12 v4
BC146	Fresh frozen tissue	breast carcinoma	Human	1	1	0	1	1	0	0	mRNA	replicate 1	HT-12 v4
BC147	Fresh frozen tissue	breast carcinoma	Human	1	1	0	2	1	1	0	mRNA	replicate 1	HT-12 v4
BC148	Fresh frozen tissue	breast carcinoma	Human	1	1	0	1	0	0	0	mRNA	replicate 1	HT-12 v4
BC149	Fresh frozen tissue	breast carcinoma	Human	1	1	0	1	1	0	0	mRNA	replicate 1	HT-12 v4
BC15	Fresh frozen tissue	breast carcinoma	Human	1	0	0	2	1	0	0	mRNA	replicate 1	HT-12 v4
BC152	Fresh frozen tissue	breast carcinoma	Human	1	1	0	1	1	1	1	mRNA	replicate 1	HT-12 v4
BC153	Fresh frozen tissue	breast carcinoma	Human	1	1	0	2	1	1	0	mRNA	replicate 1	HT-12 v4
BC155	Fresh frozen tissue	breast carcinoma	Human	1	1	1	1	1	1	0	mRNA	replicate 1	HT-12 v4
BC157	Fresh frozen tissue	breast carcinoma	Human	1	1	0	1	1	1	1	mRNA	replicate 1	HT-12 v4
BC159	Fresh frozen tissue	breast carcinoma	Human	1	1	0	1	1	1	0	mRNA	replicate 1	HT-12 v4
BC16	Fresh frozen tissue	breast carcinoma	Human	1	1	0	1	1	0	0	mRNA	replicate 1	HT-12 v4
BC160	Fresh frozen tissue	breast carcinoma	Human	1	1	0	1	1	1	0	mRNA	replicate 1	HT-12 v4
BC162	Fresh frozen tissue	breast carcinoma	Human	1	1	1	2	1	1	0	mRNA	replicate 1	HT-12 v4
BC17	Fresh frozen tissue	breast carcinoma	Human	1	0	1	3	1	1	0	mRNA	replicate 1	HT-12 v4
BC18	Fresh frozen tissue	breast carcinoma	Human	1	1	0	1	1	1	0	mRNA	replicate 1	HT-12 v4
BC19	Fresh frozen tissue	breast carcinoma	Human	0	0	1	3	1	1	0	mRNA	replicate 1	HT-12 v4
BC2	Fresh frozen tissue	breast carcinoma	Human	1	1	0	2	1	1	0	mRNA	replicate 1	HT-12 v4
BC20	Fresh frozen tissue	breast carcinoma	Human	1	1	0	2	0	0	0	mRNA	replicate 1	HT-12 v4
BC23	Fresh frozen tissue	breast carcinoma	Human	1	1	1	1	1	0	0	mRNA	replicate 1	HT-12 v4
BC24	Fresh frozen tissue	breast carcinoma	Human	1	1	1	2	1	1	1	mRNA	replicate 1	HT-12 v4
BC25	Fresh frozen tissue	breast carcinoma	Human	1	1	0	1	1	1	1	mRNA	replicate 1	HT-12 v4
BC27	Fresh frozen tissue	breast carcinoma	Human	1	0	0	1	1	1	0	mRNA	replicate 1	HT-12 v4
BC28	Fresh frozen tissue	breast carcinoma	Human	0	0	0	0	0	0	0	mRNA	replicate 1	HT-12 v4
BC29	Fresh frozen tissue	breast carcinoma	Human	1	1	0	2	1	1	0	mRNA	replicate 1	HT-12 v4
BC3	Fresh frozen tissue	breast carcinoma	Human	1	1	0	1	1	1	1	mRNA	replicate 1	HT-12 v4
BC30	Fresh frozen tissue	breast carcinoma	Human	1	1	0	1	1	1	0	mRNA	replicate 1	HT-12 v4
BC31	Fresh frozen tissue	breast carcinoma	Human	1	1	0	1	1	0	0	mRNA	replicate 1	HT-12 v4
BC34	Fresh frozen tissue	breast carcinoma	Human	1	1	0	1	1	1	0	mRNA	replicate 1	HT-12 v4
BC36	Fresh frozen tissue	breast carcinoma	Human	1	1	1	2	1	1	0	mRNA	replicate 1	HT-12 v4
BC37	Fresh frozen tissue	breast carcinoma	Human	1	0	1	1	1	1	0	mRNA	replicate 1	HT-12 v4
BC38	Fresh frozen tissue	breast carcinoma	Human	1	1	0	1	1	1	1	mRNA	replicate 1	HT-12 v4
BC39	Fresh frozen tissue	breast carcinoma	Human	0	0	0	0	0	0	0	mRNA	replicate 1	HT-12 v4
BC4	Fresh frozen tissue	breast carcinoma	Human	1	1	0	1	1	1	1	mRNA	replicate 1	HT-12 v4
BC40	Fresh frozen tissue	breast carcinoma	Human	0	0	1	3	0	0	0	mRNA	replicate 1	HT-12 v4
BC41	Fresh frozen tissue	breast carcinoma	Human	1	1	0	2	1	0	0	mRNA	replicate 1	HT-12 v4
BC42	Fresh frozen tissue	breast carcinoma	Human	1	1	0	1	1	1	1	mRNA	replicate 1	HT-12 v4
BC43	Fresh frozen tissue	breast carcinoma	Human	1	1	0	1	0	0	0	mRNA	replicate 1	HT-12 v4
BC44	Fresh frozen tissue	breast carcinoma	Human	1	1	0	1	1	1	0	mRNA	replicate 1	HT-12 v4
BC45	Fresh frozen tissue	breast carcinoma	Human	0	0	1	3	1	1	0	mRNA	replicate 1	HT-12 v4
BC46	Fresh frozen tissue	breast carcinoma	Human	1	1	0	1	1	1	0	mRNA	replicate 1	HT-12 v4
BC47	Fresh frozen tissue	breast carcinoma	Human	1	1	1	1	1	0	0	mRNA	replicate 1	HT-12 v4
BC51	Fresh frozen tissue	breast carcinoma	Human	1	1	0	1	1	1	1	mRNA	replicate 1	HT-12 v4
BC54	Fresh frozen tissue	breast carcinoma	Human	1	1	1	2	1	1	0	mRNA	replicate 1	HT-12 v4
BC56	Fresh frozen tissue	breast carcinoma	Human	1	1	1	1	0	0	0	mRNA	replicate 1	HT-12 v4
BC57	Fresh frozen tissue	breast carcinoma	Human	1	1	0	1	1	1	0	mRNA	replicate 1	HT-12 v4
BC58	Fresh frozen tissue	breast carcinoma	Human	1	1	0	1	1	1	0	mRNA	replicate 1	HT-12 v4
BC59	Fresh frozen tissue	breast carcinoma	Human	1	1	0	1	1	1	0	mRNA	replicate 1	HT-12 v4
BC61	Fresh frozen tissue	breast carcinoma	Human	1	1	0	1	1	1	0	mRNA	replicate 1	HT-12 v4
BC62	Fresh frozen tissue	breast carcinoma	Human	1	1	0	2	1	1	0	mRNA	replicate 1	HT-12 v4
BC63	Fresh frozen tissue	breast carcinoma	Human	1	1	0	2	1	1	0	mRNA	replicate 1	HT-12 v4
BC64	Fresh frozen tissue	breast carcinoma	Human	0	0	0	3	1	1	0	mRNA	replicate 1	HT-12 v4
BC66	Fresh frozen tissue	breast carcinoma	Human	1	1	0	1	1	1	0	mRNA	replicate 1	HT-12 v4
BC67	Fresh frozen tissue	breast carcinoma	Human	1	1	0	2	0	0	0	mRNA	replicate 1	HT-12 v4
BC68	Fresh frozen tissue	breast carcinoma	Human	1	0	1	2	1	1	0	mRNA	replicate 1	HT-12 v4
BC69	Fresh frozen tissue	breast carcinoma	Human	1	1	0	2	1	1	1	mRNA	replicate 1	HT-12 v4
BC7	Fresh frozen tissue	breast carcinoma	Human	1	1	1	2	1	1	0	mRNA	replicate 1	HT-12 v4
BC70	Fresh frozen tissue	breast carcinoma	Human	0	0	1	3	0	0	0	mRNA	replicate 1	HT-12 v4
BC71	Fresh frozen tissue	breast carcinoma	Human	1	1	0	1	1	1	0	mRNA	replicate 1	HT-12 v4
BC72	Fresh frozen tissue	breast carcinoma	Human	1	1	0	1	0	0	0	mRNA	replicate 1	HT-12 v4
BC75	Fresh frozen tissue	breast carcinoma	Human	0	0	0	0	1	0	0	mRNA	replicate 1	HT-12 v4
BC76	Fresh frozen tissue	breast carcinoma	Human	0	0	1	3	1	1	0	mRNA	replicate 1	HT-12 v4
BC77	Fresh frozen tissue	breast carcinoma	Human	1	1	0	2	1	1	0	mRNA	replicate 1	HT-12 v4
BC78	Fresh frozen tissue	breast carcinoma	Human	1	1	0	1	1	0	0	mRNA	replicate 1	HT-12 v4
BC79	Fresh frozen tissue	breast carcinoma	Human	1	1	0	2	1	1	0	mRNA	replicate 1	HT-12 v4
BC8	Fresh frozen tissue	breast carcinoma	Human	1	0	0	2	1	1	0	mRNA	replicate 1	HT-12 v4
BC81	Fresh frozen tissue	breast carcinoma	Human	0	0	0	0	1	1	0	mRNA	replicate 1	HT-12 v4
BC82	Fresh frozen tissue	breast carcinoma	Human	1	1	0	1	1	0	0	mRNA	replicate 1	HT-12 v4
BC83	Fresh frozen tissue	breast carcinoma	Human	0	1	0	0	0	0	0	mRNA	replicate 1	HT-12 v4
BC84	Fresh frozen tissue	breast carcinoma	Human	0	0	0	0	0	0	0	mRNA	replicate 1	HT-12 v4
BC85	Fresh frozen tissue	breast carcinoma	Human	0	0	0	0	1	0	0	mRNA	replicate 1	HT-12 v4
BC86	Fresh frozen tissue	breast carcinoma	Human	0	0	0	0	0	0	0	mRNA	replicate 1	HT-12 v4
BC87	Fresh frozen tissue	breast carcinoma	Human	0	0	0	0	0	0	0	mRNA	replicate 1	HT-12 v4
BC88	Fresh frozen tissue	breast carcinoma	Human	1	1	1	2	0	0	0	mRNA	replicate 1	HT-12 v4
BC90	Fresh frozen tissue	breast carcinoma	Human	1	1	0	2	1	1	0	mRNA	replicate 1	HT-12 v4
BC91	Fresh frozen tissue	breast carcinoma	Human	1	1	0	1	1	1	0	mRNA	replicate 1	HT-12 v4
BC92	Fresh frozen tissue	breast carcinoma	Human	1	1	0	2	1	1	0	mRNA	replicate 1	HT-12 v4
BC94	Fresh frozen tissue	breast carcinoma	Human	1	1	0	1	0	0	0	mRNA	replicate 1	HT-12 v4
BC95	Fresh frozen tissue	breast carcinoma	Human	0	1	0	0	0	0	0	mRNA	replicate 1	HT-12 v4
BC96	Fresh frozen tissue	breast carcinoma	Human	1	1	0	1	0	0	0	mRNA	replicate 1	HT-12 v4
BC97	Fresh frozen tissue	breast carcinoma	Human	0	0	1	3	0	0	0	mRNA	replicate 1	HT-12 v4
BC98	Fresh frozen tissue	breast carcinoma	Human	1	0	1	2	0	0	0	mRNA	replicate 1	HT-12 v4
BC99	Fresh frozen tissue	breast carcinoma	Human	1	0	0	2	1	0	0	mRNA	replicate 1	HT-12 v4
PROTOCOLS
# This section includes protocols and fields which are common to all Samples.
# Protocols which are applicable to specific Samples or specific channels should be included in additional columns of the SAMPLES section instead.
extract protocol	RNA was extracted with RNABee, followed by DNase I treatment with QIAGEN RNeasy mini kit in accordance with the prescribed protocol provided with the kit. Quality control was performed with Agilent Bioanalyser.
label protocol	Biotinylated cRNA were prepared with the Ambion MessageAmp kit for Illumina arrays
hyb protocol	Standard Illumina hybridization protocol
scan protocol	Standard Illumina scanning protocol
data processing	The data were normalised using quantile normalisation with IlluminaGUI in R
value definition	quantile normalized

## Sheet: Matrix normalized
# The identifiers in the ID_REF column must match the identifiers in the ID column of the referenced platform (GPLxxxx).
# The Matrix table should include normalized (scaled) signal count data and detection p-value
# Values that should be disregarded may either be left blank or labeled as "null".
ID_REF	SAMPLE 1	Detection Pval	SAMPLE 2	Detection Pval	SAMPLE 3	Detection Pval

## Sheet: Matrix non-normalized
# The identifiers in the ID_REF column must match the identifiers in the ID column of the referenced platform (GPLxxxx).
# The Matrix table should include non-normalized signal count data and detectip p-value
# Values that should be disregarded may either be left blank or labeled as "null".
ID_REF	SAMPLE 1	Detection Pval	SAMPLE 2	Detection Pval	SAMPLE 3	Detection Pval

## Sheet: Metadata Example
SERIES
title	Genome-wide analysis of mechano-responsive gene expression by tenocytes in fascicles subjected to cyclic tensile strain
summary	Analysis of mechano-regulation of tenocyte metabolism at gene expression level. The hypothesis tested in the present study was that cyclic tensile strain influence the balance of anabolism/catabolism of tenocytes. Results provide important information of the response of tenocyte to cyclic tensile strain, such as specific mechano-responsive genes, up- or down-regulated specific anabolic/catabolic …
overall design	Total RNA obtained from isolated tendon fascicles subjected to 1 or 24 hours in vitro cyclic tensile strain compared to unstrained control fascicles.
contributor	Jane,Doe
contributor	John,A,Smith
SAMPLES
# The corresponding example matrix table is included in the next worksheet.
Sample name	title	source name	organism	idat file	characteristics: Strain	characteristics: age	characteristics: tissue	molecule	label	description	platform
Sample 1	Fascicle Strained 24h rep1	Rat tail tendon	Rattus norvegicus	4307579061_B_Grn.idat	Wistar	5 months	tail tendon	total RNA	biotin	replicate 1	GPL6101
Sample 2	Fascicle Unstrained 24h rep1	Rat tail tendon	Rattus norvegicus	4307579072_A_Grn.idat	Wistar	5 months	tail tendon	total RNA	biotin	replicate 1	GPL6101
Sample 3	Fascicle Strained 1h rep2	Rat tail tendon	Rattus norvegicus	4307579062_B_Grn.idat	Wistar	5 months	tail tendon	total RNA	biotin	replicate 2	GPL6101
PROTOCOLS
extract protocol	RNA was extracted with Trizol reagent, followed by clean-up and DNase I treatment with QIAGEN RNeasy mini kit in accordance with the prescribed protocol provided with the kit. Quality control was performed with Agilent Bioanalyser.
label protocol	Biotinylated cRNA were prepared with the Ambion MessageAmp kit for Illumina arrays
hyb protocol	Standard Illumina hybridization protocol
scan protocol	Standard Illumina scanning protocol
data processing	The data were normalised using quantile normalisation with IlluminaGUI in R
value definition	quantile normalized

## Sheet: Matrix normalized Example
# truncated example of a matrix table
ID_REF	SAMPLE 1	Detection Pval	SAMPLE 2	Detection Pval	SAMPLE 3	Detection Pval
ILMN_2039396	1518.11	0.000727802	2282.83	0.00509461	1921.41	0.414119
ILMN_2040732	51.95	0.000727802	54.7	0.414119	55.89	0.103348
ILMN_2039699	58.95	0.901019	51.94	0.103348	56.13	0.0014556
ILMN_2038916	48.92	0.346434	55.26	0.0014556	57.9	0.000727802
ILMN_1374916	2196.02	0.062591	1933.99	0.000727802	2033.88	0.104076
ILMN_1353986	50.42	0.952693	44.9	0.104076	49.08	0
ILMN_1366832	55.9	0.485444	57.26	0	46.63	0.204512
ILMN_1366017	49.22	0	52.21	0.204512	55.37	0.0312955
ILMN_1354115	49.84	0.204512	52.03	0.0312955	52.02	0.0014556
ILMN_1356225	53.49	0.0312955	57.04	0.0014556	54.09	0.0283843
ILMN_1373889	58.16	0.0014556	56.67	0.0283843	42.38	0.417031
ILMN_1372047	58.86	0.0283843	65.9	0.417031	68.82	0.00509461
ILMN_1372803	54.65	0.417031	56.87	0.00509461	48.6	0.414119
ILMN_1369380	54.74	0.00509461	50.21	0.414119	50.06	0.103348
ILMN_1366418	45.82	0.414119	56.57	0.103348	57.86	0.00509461
ILMN_1349281	200.6	0.103348	188.62	0.0014556	206.05	0.414119
ILMN_1354519	51.18	0.0014556	57.64	0.000727802	51.16	0.103348
ILMN_1363384	48.93	0.000727802	57.73	0.104076	56.48	0.0014556
ILMN_1373604	50.86	0.104076	53.08	0.117397	52.4	0.000727802
ILMN_1356361	65.88	0.104076	67.05	0.118644	66.22	0.104076

## Sheet: Matrix non-normalized Example
# truncated example of a matrix table
ID_REF	SAMPLE 1	Detection Pval	SAMPLE 2	Detection Pval	SAMPLE 3	Detection Pval
ILMN_2039396	1575.11	0.000727802	1632.11	0.00509461	1689.11	0.414119
ILMN_2040732	108.95	0.000727802	165.95	0.414119	222.95	0.103348
ILMN_2039699	115.95	0.901019	172.95	0.103348	229.95	0.0014556
ILMN_2038916	105.92	0.346434	162.92	0.0014556	219.92	0.000727802
ILMN_1374916	2253.02	0.062591	2310.02	0.000727802	2367.02	0.104076
ILMN_1353986	107.42	0.952693	164.42	0.104076	221.42	0
ILMN_1366832	112.9	0.485444	169.9	0	226.9	0.204512
ILMN_1366017	106.22	0	163.22	0.204512	220.22	0.0312955
ILMN_1354115	106.84	0.204512	163.84	0.0312955	220.84	0.0014556
ILMN_1356225	110.49	0.0312955	167.49	0.0014556	224.49	0.0283843
ILMN_1373889	115.16	0.0014556	172.16	0.0283843	229.16	0.417031
ILMN_1372047	115.86	0.0283843	172.86	0.417031	229.86	0.00509461
ILMN_1372803	111.65	0.417031	168.65	0.00509461	225.65	0.414119
ILMN_1369380	111.74	0.00509461	168.74	0.414119	225.74	0.103348
ILMN_1366418	102.82	0.414119	159.82	0.103348	216.82	0.00509461
ILMN_1349281	257.6	0.103348	314.6	0.0014556	371.6	0.414119
ILMN_1354519	108.18	0.0014556	165.18	0.000727802	222.18	0.103348
ILMN_1363384	105.93	0.000727802	162.93	0.104076	219.93	0.0014556
ILMN_1373604	107.86	0.104076	164.86	0.117397	221.86	0.000727802
ILMN_1356361	122.88	0.104076	179.88	0.118644	236.88	0.104076
